# Supplementary material for: Incidence, antimicrobial susceptibility & out of pocket expenditure of severe enteric fever in Chandigarh, north India
Source: PubMed Central journal article supplement — Indian J Med Res. 2024 Sep 10;159(6):567–75. doi: 10.25259/IJMR_2080_22 (PMC11463869; doi:10.25259/ijmr_2080_22), 2024-09-10
Supplement: IJMR-159-6-567-SA1.pdf [file IJMR-159-6-567-SA1.pdf]

**Appendix – 1**

Subject ID/IPS ID 

|  |  |  |  |  |  |
|--|--|--|--|--|--|
|  |  |  |  |  |  |
|--|--|--|--|--|--|

17 A. Direct Out of Pocket (OOP) expenditure during hospitalization in the study facility

| Out of Pocket Expenditure     | Week |     |     |     |     |     |     |
|-------------------------------|------|-----|-----|-----|-----|-----|-----|
|                               | Day  | Day | Day | Day | Day | Day | Day |
| Admitted in: General/ Private |      |     |     |     |     |     |     |
| Date of contact               |      |     |     |     |     |     |     |
| Medicines                     |      |     |     |     |     |     |     |
| Consumables                   |      |     |     |     |     |     |     |
| Lab tests/ Diagnostics        |      |     |     |     |     |     |     |
| User fees/Hospital charges    |      |     |     |     |     |     |     |
| Procedures/ surgery           |      |     |     |     |     |     |     |
| <b>Total medical costs</b>    |      |     |     |     |     |     |     |
| Travel cost                   |      |     |     |     |     |     |     |
| Meal costs                    |      |     |     |     |     |     |     |
| Boarding/Lodging costs        |      |     |     |     |     |     |     |
| Informal costs                |      |     |     |     |     |     |     |
| Others, if any                |      |     |     |     |     |     |     |
| <b>Daily total expenses</b>   |      |     |     |     |     |     |     |

Data collected by: \_

Date: \_ / \_ / \_ \_ \_ \_

Signature

Data verified by: \_

Date: \_ / \_ / \_ \_ \_ \_

Signature
