# Supplementary material for: Incidence, antimicrobial susceptibility & out of pocket expenditure of severe enteric fever in Chandigarh, north India
Source: PubMed Central journal article supplement — Indian J Med Res. 2024 Sep 10;159(6):567–75. doi: 10.25259/IJMR_2080_22 (PMC11463869; doi:10.25259/ijmr_2080_22), 2024-09-10
Supplement: IJMR-159-6-567-ST1.pdf [file IJMR-159-6-567-ST1.pdf]

| <b>Supplementary Table I. Clinical features of the all febrile illness cases enrolled in the study (May 2018-March 2020)</b> |                          |                           |                        |          |
|------------------------------------------------------------------------------------------------------------------------------|--------------------------|---------------------------|------------------------|----------|
| Characteristics                                                                                                              | EF positive<br>n=133 (%) | EF negative<br>n=1517 (%) | Total AFI<br>N=1650(%) | P Value  |
| History of illness before admission                                                                                          |                          |                           |                        | 0.0001*  |
| Same day                                                                                                                     | 2 (0.14)                 | 71 (4.6)                  | 73 (4.4)               |          |
| 1 day                                                                                                                        | 5 (3.7)                  | 189 (12.4)                | 194 (11.7)             |          |
| 2 days                                                                                                                       | 10 (7.5)                 | 218 (14.3)                | 228 (13.8)             |          |
| 3 days or more                                                                                                               | 116 (87.2)               | 1039 (68.4)               | 1155 (70)              |          |
| Prior treatment history                                                                                                      |                          |                           |                        | 0.19     |
| Yes                                                                                                                          | 2 (1.5)                  | 8 (0.5)                   | 10 (0.61)              |          |
| No                                                                                                                           | 131 (98.5)               | 1509 (99.5)               | 1640 (99.39)           |          |
| Presenting symptoms of illness                                                                                               |                          |                           |                        |          |
| Fever                                                                                                                        | 133 (100)                | 1517 (100)                | 1650 (100)             |          |
| Fever & headache                                                                                                             | 12 (9)                   | 131 (8.6)                 | 133 (8)                |          |
| Fever, vomiting and headache                                                                                                 | 9 (6.8)                  | 58 (3.8)                  | 67 (4)                 |          |
| Fever, abdominal pain, vomiting and headache                                                                                 | 9 (6.8)                  | 75 (4.9)                  | 84 (5.1)               |          |
| Fever, abdominal pain and headache                                                                                           | 4 (3)                    | 48 (3.16)                 | 52 (3.2)               |          |
| Fever, abdominal pain, vomiting                                                                                              | 3 (2.3)                  | 36 (2.4)                  | 39 (2.4)               |          |
| Duration of hospitalization (days) (IQR)                                                                                     | 4 (3)                    | 2 (0.1)                   | 6 (0.36)               | <0.0001* |
| Blood culture report (n=1600)                                                                                                |                          |                           |                        | 0.0001*  |
| <i>Salmonella Typhi</i>                                                                                                      | 92 (69.2)                | 0 (0)                     | 92 (5.58)              |          |
| <i>Salmonella Paratyphi</i>                                                                                                  | 41 (30.8)                | 0 (0)                     | 41 (2.48)              |          |
| Others                                                                                                                       | 0 (0)                    | 1517 (100)                | 1517 (91.94)           |          |
| Complications                                                                                                                |                          |                           |                        |          |
| None                                                                                                                         | 127 (95.5)               | 1345 (88.6)               | 1472 (89.21)           | 0.193    |
| Thrombocytopenia                                                                                                             | 1 (0.8)                  | 47 (3)                    | 48 (2.91)              |          |
| Acute hepatitis                                                                                                              | 0 (0)                    | 13 (0.8)                  | 13 (0.79)              |          |
| Persisting fever                                                                                                             | 3 (2.3)                  | 8 (0.5)                   | 11 (0.67)              |          |
| Anaemia                                                                                                                      | 0 (0)                    | 9 (0.6)                   | 9 (0.55)               |          |
| Others                                                                                                                       | 2 (1.5)                  | 90 (5.9)                  | 92 (5.58)              |          |
| Outcome                                                                                                                      |                          |                           |                        |          |
| Death                                                                                                                        | 0 (0)                    | 1 (0.006)                 | 1 (0.06)               | 0.13     |
| Discharged                                                                                                                   | 0 (0)                    | 3 (0.19)                  | 3 (0.18)               |          |
| Left against medical advice                                                                                                  | 1 (0.8)                  | 83 (5.4)                  | 84 (5.09)              |          |
| Recovered                                                                                                                    | 113 (85)                 | 1193 (78.7)               | 1306 (79.15)           |          |
| Referred                                                                                                                     | 19 (14.3)                | 237 (15.6)                | 256 (15.52)            |          |

P\*\*\* <0.0001 as significant. AFI, all febrile illness; EF, enteric fever; IQR, interquartile range
